# Supplementary material
Source: PubMed Central journal article supplement (PMC4772601)
Supplement: JB.00963-15_zjb999093962so1.pdf [file JB.00963-15_zjb999093962so1.pdf]

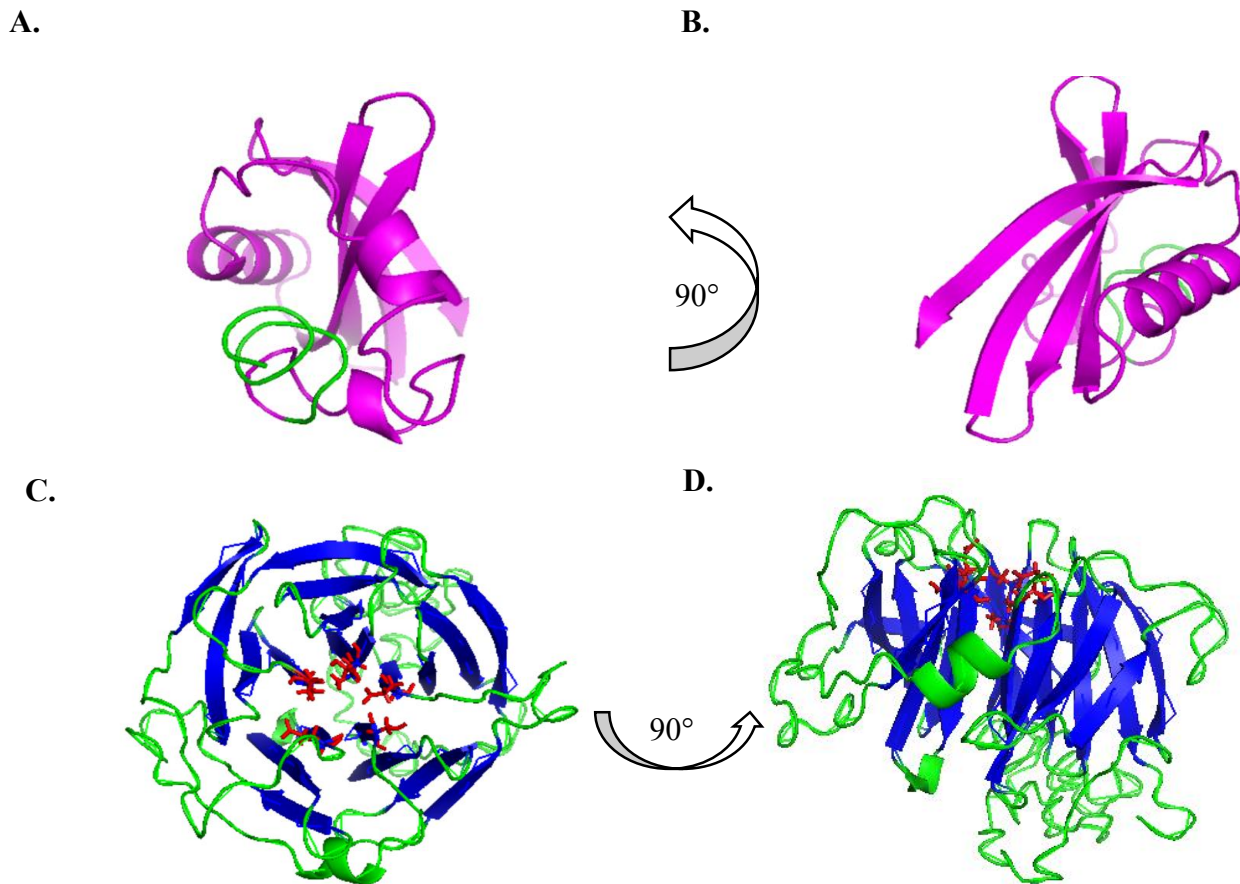

Figure S1 Predicted structure of *P. aeruginosa* PA0320 (CarO) (A and B) and PA0327 (CarP) (C and D). Structural predictions were made by using i-TASSER (8) and HHpred (9), and visualized by using PyMOL (The PyMOL Molecular Graphics System, Version 1.7.6 Schrödinger, LLC). The structural predictions for CarO is based on threading onto putative lipoprotein of *Clostridium difficile* 630 (PDB#4EXR). CarO is predicted to form a OB fold domain as highlighted in magenta (A and B). The structure is rotated 90° around the y-axis (B). The structural predictions for CarP were based on threading onto the *E. coli* YjiK (PDB#3QQZ). CarP is predicted to form a  $\beta$ -propeller, with the  $\beta$ -sheets highlighted in blue. The amino acid residues predicted to bind  $\text{Ca}^{2+}$  are within the central pocket, and are highlighted in red. (A) Top view of the predicted structure. (B) 90° rotation around the x-axis showing the side view of the  $\beta$ -propeller structure. Rotating the structure reveals that the predicted  $\text{Ca}^{2+}$  binding residues are located at one entrance of the  $\beta$ -propeller tunnel.

**Table S1. Bacterial Strains, plasmids and Oligonucleotide Sequences**

| Strains/Plasmids                                 | Description                                                          | Reference  |
|--------------------------------------------------|----------------------------------------------------------------------|------------|
| <i>P. aeruginosa</i>                             |                                                                      |            |
| PAO1                                             | Wild type strain, Alg <sup>-</sup>                                   | (1)        |
| FRD1                                             | Cystic Fibrosis isolate, Alg <sup>+</sup>                            | (2)        |
| PA0320-H07::ISlacZ/hah                           | PAO1 with Tn5 disruption of PA0320                                   | (3)        |
| PA0327-B11::ISphoA/hah                           | PAO1 Tn5 disruption of PA0327                                        | (3)        |
| $\Delta carR::Gm$                                | PAO1 with deletion of <i>carR</i> replaced with Gm <sup>r</sup> gene | This study |
| PA0320-H07::ISlacZ/hah/P <sub>BAD</sub> -PA0320  | Tn5 disruption of PA0320 complemented by P <sub>BAD</sub> -PA0320    | This study |
| PA0327-B11::ISphoA/hah/ P <sub>BAD</sub> -PA0327 | Tn5 disruption of PA0320 complemented by P <sub>BAD</sub> -PA0327    | This study |
| $\Delta carR::Gm/ P_{BAD-carRS}$                 | Deletion of <i>carR</i> complemented by <i>cars</i>                  | This study |
| Plasmids                                         |                                                                      |            |
| pTJ1                                             | Tn7 vector containing P <sub>BAD</sub> promoter, Tm <sup>r</sup>     | (4)        |
| pMMB66EH-AEQ                                     | pMMB66EH containing aequorin gene from <i>Aequorea Victoria</i>      | (5)        |
| pTNS1                                            | Helper plasmid for Tn7 transposase, Ap <sup>r</sup>                  | (6)        |
| pFLP2                                            | Helper plasmid for FLP recombinase, Ap <sup>r</sup>                  | (7)        |
| pCR2.1                                           | Cloning vector from Invitrogen, Ap <sup>r</sup> , Km <sup>r</sup>    | Invitrogen |
| pTA53                                            | PA0320 in pCR2.1                                                     | This study |
| pTA54                                            | PA0327 in PCR2.1                                                     | This study |
| pTA55                                            | P <sub>BAD</sub> -PA0320 in pTJ1                                     | This study |
| pTA56                                            | P <sub>BAD</sub> -PA0327 in pTJ1                                     | This study |
| pTA57                                            | PA2656 in pCR2.1                                                     | This study |
| pTA99                                            | PA2657 in pCR2.1                                                     | This study |
| pTA104                                           | P <sub>BAD</sub> -PA2656 and 2657 in pTJ1                            | This study |
| Oligonucleotides                                 |                                                                      |            |

|                |                                   |
|----------------|-----------------------------------|
| aequorin – For | CTTACATCAGACTTCGACAACCCAAG        |
| aequorin – Rev | CGTAGAGCTTCTTAGGGCACAG            |
| PA0320 NcoI 5' | <u>ACCCATGGAACTTCGTCACCT</u>      |
| PA0320 XbaI 3' | GGTCTAGAAGGGGTTCAACCGG            |
| PA0327 NcoI 5' | TGCCATGGCTATCCACGCCCA             |
| PA0327 XbaI 3' | AGTCTAGAGCGGGCCAGGGG              |
| 5'PA2657-EcoRI | GCAGAATTCATCCTGAAGGACGAGGAAGACGAC |
| 3'PA2657       | GTCCAGTTGCATGCCGTTTCG             |
| 5'PA2656       | CCAGTGCGTGTGCCTGAACG              |
| 3'PA2656-EcoRV | CGAGATATCCGGGACTGTCCGGCAAATGGT    |

RT-qPCR Primers

|                 |                       |
|-----------------|-----------------------|
| 0320Left_RtPCR  | GACACCCCGGTGGTCTCCA   |
| 0320Right_RtPCR | TCGACTTCGCCGGTCAGCTTG |
| 0327Left_RtPCR  | CCGGTCGGGATCGAAGGTCA  |
| 0327Right_RtPCR | GGTTCGCCGTCCAGGAGTGG  |
| acpLeftRT-PCR2  | ACTCGGCGTGAAGGAAGAAG  |
| acpRightRT-PCR2 | CGACGGTGTCAAGGGAGT    |

1. **Stover CK, Pham XQ, Erwin AL, Mizoguchi SD, Warrenner P, Hickey MJ, Brinkman FS, Hufnagle WO, Kowalik DJ, Lagrou M, Garber RL, Goltry L, Tolentino E, WestbrookWadman S, Yuan Y, Brody LL, Coulter SN, Folger KR, Kas A, Larbig K, Lim R, Smith K, Spencer D, Wong GK, Wu Z, Paulsen IT, Reizer J, Saier MH, Hancock RE, Lory S, Olson MV. 2000. Complete genome sequence of *Pseudomonas aeruginosa* PAO1, an opportunistic pathogen. Nature **406**:959-964.**
2. **Silo-Suh LA, Suh SJ, Ohman DE, Wozniak DJ, Pridgeon JW. 2015. Complete genome**

- sequence of *Pseudomonas aeruginosa* mucoid strain FRD1, isolated from a cystic fibrosis patient. Genome Announc 3.
3. **Held K, Ramage E, Jacobs M, Gallagher L, Manoil C.** 2012. Sequence-verified two-allele transposon mutant library for *Pseudomonas aeruginosa* PAO1. J Bacteriol **194**:6387-6389.
  4. **Damron FH, McKenney ES, Schweizer HP, Goldberg JB.** 2013. Construction of a broad-host-range Tn7-based vector for single-copy PBAD-controlled gene expression in Gramnegative bacteria. Applied and environmental microbiology **79**:718-721.
  5. **Watkins NJ, Knight MR, Trewavas AJ, Campbell AK.** 1995. Free Calcium Transients in Chemotactic and Non-Chemotactic Strains of Escherichia-Coli Determined by Using Recombinant Aequorin. Biochemical Journal **306**:865-869.
  6. **Choi KH, Gaynor JB, White KG, Lopez C, Bosio CM, Karkhoff-Schweizer RR, Schweizer HP.** 2005. A Tn7-based broad-range bacterial cloning and expression system. Nat Methods **2**:443-448.
  7. **Hoang TT, Karkhoff-Schweizer RR, Kutchma AJ, Schweizer HP.** 1998. A broad-host-range Flp-FRT recombination system for site-specific excision of chromosomally-located DNA sequences: application for isolation of unmarked *Pseudomonas aeruginosa* mutants. Gene **212**:77-86.
  8. **Yang J, Yan R, Roy A, Xu D, Poisson J, Zhang Y.** 2015. The I-TASSER Suite: protein structure and function prediction. Nat Methods **12**:7-8.
  9. **Biegert A, Mayer C, Remmert M, Söding J, Lupas AN.** 2006. The MPI Bioinformatics Toolkit for protein sequence analysis. Nucleic acids research **34**:W335-W339.
